# Supplementary material for: Synergistic catalytic effects of MoO2 and Vulcan carbon on the oxygen reduction reaction
Source: Royal Society of Chemistry journal article supplement (doi:10.1039/d0nj05272h), 2021-01-01
Supplement: d0nj05272h1.pdf [file d0nj05272h1.pdf]

## Supplementary Information

# Synergistic Catalytic Effects of MoO<sub>2</sub> and Vulcan Carbon toward Oxygen Reduction Reaction

Weikai Liu, Jiannan Cai, Baohua Huang, Xiaofeng Zhang\* and Shen Lin\*

College of Chemistry and Materials Science, Fujian Normal University, Fuzhou, Fujian 350007, China. E-mail: shenlin@fjnu.edu.cn

### Characterization

XRD was carried out using an X-ray diffractometer (Bruker D8) in the range of 50-900. XPS was done on an Escalab 250Xi X-ray photoelectron spectrometer with Al K $\alpha$  as M-SRRPS (Microstrip Slit-Ring Resonator Plasma Source). The method of energy calibration is a charged correction, using 284.6 eV as standard value to calibrate C1s spectra. According to the difference of C1s spectra, then all the XPS spectra of the remaining elements increased or decreased to a certain value. Then Using XPS peak software to analyze data. The steps are importing data, establishing baseline, adding peak (according to references), adjusting parameters (FWHM 0.5-3.5eV, the area of peak). The scanning electron microscopy (SEM) images were measured using a scanning electron microscope (JSM-7500F, 5KV). The transmission electron microscopy (TEM) was operated by Tecnai-G20 TEM at an acceleration voltage of 200KV. The high resolution transmission electron microscopy (HRTEM) images were obtained by Tecnai G20 HRTEM. Brunner-Emmet-Teller (BET) measurements served to test the specific surface areas (Micro for TriStar II Plus 2.02). The actual content of MoO<sub>2</sub> on the glass-carbon disc electrode was determined by Thermo 6300 inductively coupled plasma atomic (ICP) emission spectrometry.

### Figures and Tables

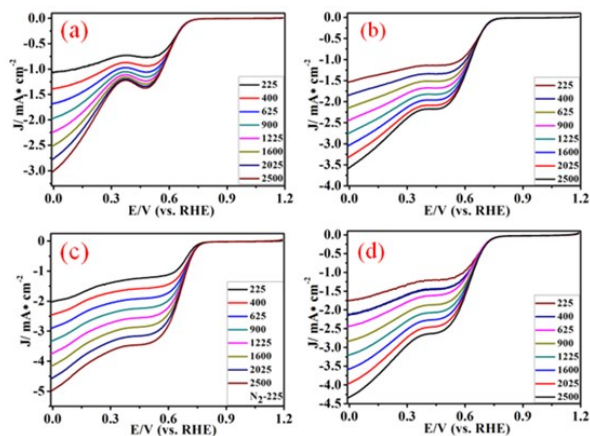

Figure S1 LSV curves of the MoO<sub>2</sub>/C-15(a), MoO<sub>2</sub>/C-20(b), MoO<sub>2</sub>/C-30(c) and MoO<sub>2</sub>/C-40(d) in O<sub>2</sub>-saturated 0.1 M KOH solution at different rotation rates; scan rate: 10 mV s<sup>-1</sup>.

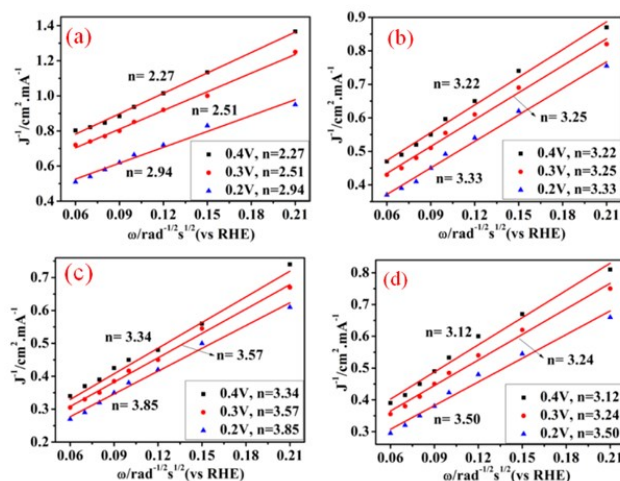

Figure S2 Koutecky-Levich plots for MoO<sub>2</sub>/C-15(a), MoO<sub>2</sub>/C-20(b), MoO<sub>2</sub>/C-30(c) and MoO<sub>2</sub>/C-40(d), at different electrode potentials.

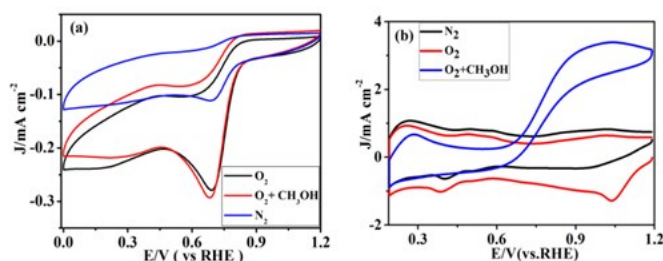

Figure S3 CV curves of (a) MoO<sub>2</sub>/C and (b) Pt/C after adding CH<sub>3</sub>OH (vol. 10) in N<sub>2</sub>- and O<sub>2</sub>-saturated and O<sub>2</sub>-saturated 0.1 M KOH. Scan rate: 30 mV s<sup>-1</sup>.

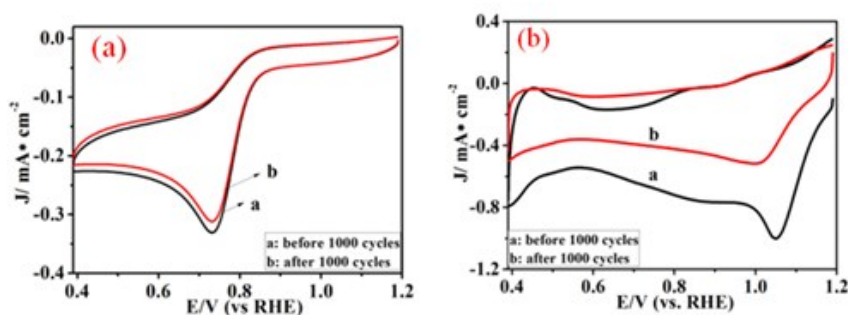

Figure S4 Continuous cyclic voltammograms of (a) MoO<sub>2</sub>/C-30, (b) Pt/C in 0.1 M KOH solution saturated with O<sub>2</sub> at scan rate of 20 mV s<sup>-1</sup>

**Tab. S1** Physical parameters of different catalysts in O<sub>2</sub>-saturated 0.1 M KOH solution

| Materials            | E <sub>Onset</sub> /V <sup>a</sup> | E <sub>1/2</sub> /V <sup>b</sup> | Ref. <sup>c</sup> |
|----------------------|------------------------------------|----------------------------------|-------------------|
| Pt/C                 | 0.97                               | 0.87                             | This work         |
| MoO <sub>2</sub> /C  | 0.76                               | 0.62                             | This work         |
| MoO <sub>2</sub> /NG | 0.8                                | 0.6                              | Ref.13            |
| Mo/N-C               | 0.9                                | 0.83                             | Ref.14            |

|                                                  |      |      |        |
|--------------------------------------------------|------|------|--------|
| Ni <sub>3</sub> S <sub>2</sub> /MoS <sub>2</sub> | 0.95 | 0.88 | Ref.15 |
|--------------------------------------------------|------|------|--------|

**Tab. S2** Physical parameters of different samples in O<sub>2</sub>-saturated 0.1 M KOH solution

| Materials              | peak potential/V | current density/ mA cm <sup>-2</sup> | kinetic currents of LSV / mA cm <sup>-2</sup> |
|------------------------|------------------|--------------------------------------|-----------------------------------------------|
| MoO <sub>2</sub> /C-15 | 0.68             | 0.25                                 | 2.51                                          |
| MoO <sub>2</sub> /C-20 | 0.75             | 0.28                                 | 3.04                                          |
| MoO <sub>2</sub> /C-30 | 0.76             | 0.36                                 | 4.21                                          |
| MoO <sub>2</sub> /C-40 | 0.75             | 0.33                                 | 3.57                                          |

**Tab. S3** Actual MoO<sub>2</sub> load on GCDE

| Sample name            | Actual content of MoO <sub>2</sub> |
|------------------------|------------------------------------|
| MoO <sub>2</sub> /C-15 | 0.81 g/cm <sup>-2</sup>            |
| MoO <sub>2</sub> /C-20 | 0.83 g/cm <sup>-2</sup>            |
| MoO <sub>2</sub> /C-30 | 0.85 g/cm <sup>-2</sup>            |
| MoO <sub>2</sub> /C-40 | 0.84 g/cm <sup>-2</sup>            |

**Tab. S4** Surface area of different samples

| Sample name                 | Surface area / m <sup>2</sup> g <sup>-1</sup> |
|-----------------------------|-----------------------------------------------|
| <b>MoO<sub>2</sub>/C-15</b> | 94.1617                                       |
| <b>MoO<sub>2</sub>/C-20</b> | 69.2278                                       |
| <b>MoO<sub>2</sub>/C-30</b> | 81.7275                                       |
| <b>MoO<sub>2</sub>/C-40</b> | 40.2054                                       |

**Tab. S5** the components percentages of MoO<sub>2</sub>/C-30

| Element name | Atomic percentage/% | Mass percentage/% |
|--------------|---------------------|-------------------|
| <b>C</b>     | 52.32               | 26.22             |
| <b>O</b>     | 35.10               | 23.43             |
| <b>Mo</b>    | 12.58               | 50.36             |

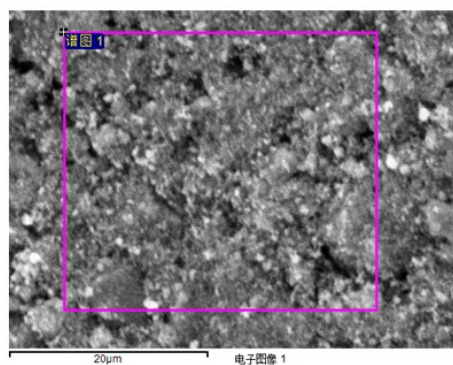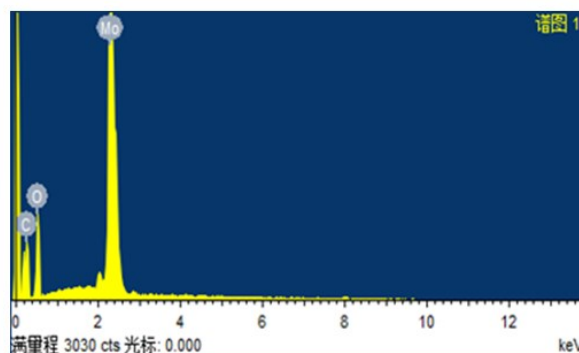

<sup>a</sup> All of the potential values from references were converted to vs. RHE for comparison.

<sup>b</sup> To minimize the effect of the residual currents on the potential value, the onset potential in this research was defined as a potential required for generating an ORR current density of 0.1 mAcm<sup>-2</sup> in the LSV measurement.

<sup>c</sup> Ref. 13, Ref. 14 and Ref. 15 are the cited references in the main text.
